# Supplementary material for: Habitat fragmentation is linked to cascading effects on soil functioning and CO2 emissions in Mediterranean holm-oak-forests
Source: PeerJ. 2018 Oct 30;6:e5857. doi: 10.7717/peerj.5857 (PMC6214227; doi:10.7717/peerj.5857)
Supplement: Data S1 [file peerj-06-5857-s002.xls]

## Sheet: Data
ID_fragment	ID-Soil	Matrix_influence	Fragment_size	Cover	Soil_Resp	Glucosidase	Phosphatase	Chitinase	Bac_Richness	Fun_Richness	Microbial_biomass	Soil_Temp	Soil_moisture	pH	SOM	Influence_indexD	PC1_Nut	PC2_Nut		ID_fragment	Fragment identification
FG1Q	C13-01	1	3	5	2.399	9.36	6.07	2.43	31	26	1198.42	17.9	11	8.14	5.392	427.853	-2.394	0.106		ID-Soil	Soil sample identification
FG1Q	C13-02	1	3	5	2.652	10	7.47	2.14	30	26	1553.23	18.05	23.55	7.82	11.951	368.802	-1.634	1.542		Matrix_influence	Level of matrix influence	1- Low influence; 2- Mid influence; 3- High influence
FG1Q	C13-03	1	3	5	1.705	3.66	2.1	0.72	29	29	906.16	16.95	15.99	8.22	5.04	553.33	-3.44	-0.242		Fragment_size	Size of the forest fragments	3- Forest interiors; 2- Forest edges; 1- Small fragments
FG1Q	C13-04	1	3	5	2.841	13.87	9.9	8.67	27	27	1971.39	18.9	21.01	8.12	15.677	283.806	-2.08	1.755		Cover	Tree canopy cover	4- Open areas; 5-Under canopy
FG1Q	C13-05	1	3	5	1.199	6.63	6.68	1.65	27	29	756.34	19.15	13.25	8.1	2.96	63.155	-6.051	-0.776		Soil_Resp	Soil respiration	micro mol (CO2) m2 s-1
FG1Q	C13-06	1	3	4	1.199	1.69	0.02	0.83	27	27	474.86	24.2	7.92	8.29	2.396	135.851	-3.743	-1.664		Glucosidase	β-glucosidase activity	pmol min− 1 mg− 1
FG1Q	C13-07	1	3	4	2.21	4.2	2.8	0.33	30	30	812.77	23.9	9.05	8.43	3.385	136.722	-2.454	-1.35		Phosphatase	Phosphatase activity	pmol min− 1 mg− 1
FG1Q	C13-08	1	3	4	1.073	2.67	2.25	0.18	23	30	472.87	26.4	7.84	8.34	3.363	205.451	-4.151	-1.19		Chitinase	Chitinase activity	pmol min− 1 mg− 1
FG1Q	C13-09	1	3	4	1.199	2.4	1.2	0.1	30	30	527.81	26.3	8.26	8.52	2.673	102.676	-3.686	-1.12		Bac_Richness	Bacterial richness	Number of OTUS (R)
FG1Q	C13-10	1	3	4	0.758	1.75	2.71	0.14	24	31	341.86	25.2	7.81	8.05	2.177	26.405	-3.979	-1.502		Fun_Richness	Fungal richness	Number of OTUS (R)
FG2Q	C13-11	1	3	5	1.578	6.98	2.69	1.51	36	27	1033.52	18.15	15.25	7.97	8.654	583.97	-1.058	0.662		Microbial_biomass	Microbial biomass	mg C kg -1
FG2Q	C13-12	1	3	5	4.23	7.89	19.37	2.78	36	27	997.49	19.75	11.6	7.99	4.045	139.76	-0.377	-2.114		Soil_Temp	Soil temperature	∘C
FG2Q	C13-13	1	3	5	1.894	5.74	2.79	0.76	35	28	963	19.1	12.68	8.32	4.187	305.13	1.07	-1.149		Soil_moisture	Soil moisture	%
FG2Q	C13-14	1	3	5	1.705	6.24	2.92	0.79	38	26	1251.75	18.4	10.34	8.25	6.518	383.632	0.308	-0.43		pH	pH	pH
FG2Q	C13-15	1	3	5	2.652	9.2	3.32	1.68	37	30	1144.81	20.6	15.51	8.11	6.71	300.729	-0.186	-0.663		SOM	Soil organic matter	%
FG2Q	C13-16	1	3	4	1.641	2.15	2.28	0.11	30	25	355.34	27.5	9.11	8.32	3.235	185.905	-1.615	-1.75		Influence_indexD	Tree influence index based in the trees basal area
FG2Q	C13-17	1	3	4	1.578	2.54	0.89	0.24	34	26	555.89	26.15	6.11	8.24	2.45	35.917	-0.167	-2.634		PC1_Nut	Component 1 of the nutrients principal component analyses
FG2Q	C13-18	1	3	4	1.452	4.51	1.88	0.65	39	26	775.41	27.4	8.65	8.28	2.904	95.047	1.285	-1.607		PC2_Nut	Component 2 of the nutrients principal component analyses
FG2Q	C13-19	1	3	4	1.389	2.7	2.33	0.08	38	29	550.55	25.2	3.73	8.39	2.718	147.234	-0.566	-1.928
FG2Q	C13-20	1	3	4	3.093	2.89	1.57	0.27	33	28	758.16	27.8	6.43	8.26	3.554	108.567	-0.344	-1.282
FG3Q	C13-21	1	3	5	2.273	11.63	6.84	0.83	36	36	1123.27	21.1	9.99	7.54	6.841	371.554	-2.013	0.295
FG3Q	C13-22	1	3	5	0.821	5.8	5.9	1.75	35	30	996.51	18.9	8.32	7.68	8.172	260.375	-0.937	0.665
FG3Q	C13-23	1	3	5	1.199	11.43	5.09	0.91	37	33	1881.45	16.1	11.06	7.74	9.766	338.417	-3.243	1.655
FG3Q	C13-24	1	3	5	2.336	10.08	3.83	0.81	37	36	993.9	19.65	11.99	8	11.927	220.71	0.482	1.423
FG3Q	C13-25	1	3	5	0.442	3.87	2.15	0.59	39	31	789.43	19.15	9.97	7.99	8.197	169.889	-3.66	0.832
FG3Q	C13-26	1	3	4	0.694	3.63	2.86	0.19	35	35	1050.82	23.25	6.39	8.08	8.205	122.046	-3.068	0.064
FG3Q	C13-27	1	3	4	0.568	4.48	3.26	0.18	36	35	851.81	22.35	4.44	8.1	3.846	82.76	-2.665	-0.757
FG3Q	C13-28	1	3	4	0.821	3.86	2.57	0.36	33	32	735.01	26.75	8.66	8.13	3.577	113.318	-3.899	-0.295
FG3Q	C13-29	1	3	4	2.399	2.72	1.83	0.15	41	30	601.33	29	8.3	8.21	3.639	78.825	0.338	-1.034
FG3Q	C13-30	1	3	4	3.409	2.73	6.15	0.15	36	32	666	30.1	5.87	8.03	3.604	59.436	-4.662	0.632
FG1Q	C13-31	2	2	5	2.21	15.34	1.52	1.51	37	30	1599.68	15.55	23.53	8.01	8.21	976.637	-4.252	2.298
FG1Q	C13-32	2	2	5	2.083	22.79	14.08	3.23	36	29	1447.82	16.05	20.43	7.87	15.174	372.495	-0.665	3.756
FG1Q	C13-33	2	2	5	2.336	20.78	8.93	1.51	35	27	2695.71	16.5	30.96	7.92	18.198	270.601	-1.705	3.814
FG1Q	C13-34	2	2	5	1.957	9.91	5.93	2.11	38	30	1624.6	18.4	18.78	8.19	9.185	657.787	-1.242	1.286
FG1Q	C13-35	2	2	5	1.452	10.47	11.45	3.61	39	29	1689.47	18.2	20.07	8.3	8.431	596.529	-2.629	0.843
FG1Q	C13-36	2	2	4	3.725	17.05	6.82	0.75	29	29	1198.88	21.55	18.96	8.16	9.167	384.476	-3.837	3.16
FG1Q	C13-37	2	2	4	4.924	11.74	5.48	0.62	36	29	718.91	22.95	16.89	8.12	9.373	133.261	-1.817	3.502
FG1Q	C13-38	2	2	4	3.283	4.42	2	0.24	36	31	1116.29	23.95	14.08	7.99	6.8	87.279	-3.06	0.566
FG1Q	C13-39	2	2	4	1.073	3.88	1.42	0.15	40	29	607.85	24.55	10.22	8.31	3.194	251.324	-1.53	-0.445
FG1Q	C13-40	2	2	4	1.641	2.57	1.31	0.11	32	34	531.25	13.35	10.43	8.27	3.524	229.698	-3.792	-0.633
FG2Q	C13-41	2	2	5	0.379	12.13	7.9	1.77	36	29	1693.29	18.95	12.12	7.88	8.414	242.169	0.013	0.6
FG2Q	C13-42	2	2	5	2.399	10.54	8.96	2.2	38	26	1856.82	19.3	11.47	7.55	11.313	409.769	0.42	1.969
FG2Q	C13-43	2	2	5	2.462	11.74	12.06	2.45	42	31	2372.38	18.05	17.1	7.75	12.963	621.561	1.378	1.706
FG2Q	C13-44	2	2	5	0.505	7.25	7.33	5.48	36	31	1111.23	18.65	15.58	8.01	8.476	289.757	-1.874	1.034
FG2Q	C13-45	2	2	5	0.884	9.14	5.44	1.25	39	29	1595.77	16.7	15.61	7.88	12.748	573.797	1.041	1.906
FG2Q	C13-46	2	2	4	0.568	6.61	4.84	0.14	31	27	944	26.05	6.58	8.14	2.899	82.338	0.285	-1.64
FG2Q	C13-47	2	2	4	2.715	10.6	8.52	0.63	36	31	985.4	22.95	11.41	8.03	4.681	160.126	-0.052	-0.552
FG2Q	C13-48	2	2	4	1.894	5.9	3.73	0.65	39	29	822.39	25.3	7.43	8.1	3.821	251.33	-0.301	-0.903
FG2Q	C13-49	2	2	4	2.02	8.38	3.74	0.54	41	27	1388.03	25.05	9.43	8.04	5.389	110.608	-0.103	-0.999
FG2Q	C13-50	2	2	4	1.641	9.09	3.02	0.62	40	31	701.96	20.25	9.31	8.35	2.651	222.427	2.346	-2.16
FG3Q	C13-51	2	2	5	1.641	9.37	4.47	0.73	35	28	755.22	16.2	5.75	8.37	4.278	1090.25	1.014	-1.444
FG3Q	C13-52	2	2	5	1.641	14.51	8.25	1.15	36	27	1205.87	18.6	9.62	8.11	6.447	810.356	1.261	-0.015
FG3Q	C13-53	2	2	5	0.884	10.49	6.38	0.44	33	27	1257.44	17	5.83	8.36	4.971	480.003	0.756	-0.711
FG3Q	C13-54	2	2	5	1.136	21.97	4.13	3.32	38	29	1932.62	18.05	19.43	7.77	15.866	894.873	1.328	2.844
FG3Q	C13-55	2	2	5	2.02	6.43	3.65	0.72	36	30	806.41	17.2	5.71	8.32	3.184	763.181	0.722	-1.69
FG3Q	C13-56	2	2	4	1.641	4.72	0.3	0.54	34	26	482.49	26.1	7.47	8.42	2.497	462.656	1.328	-2.213
FG3Q	C13-57	2	2	4	2.336	2.27	0.15	0.44	34	29	617.84	17.35	10.65	8.63	3.011	338.4	0.614	-1.873
FG3Q	C13-58	2	2	4	2.02	4.1	2.2	0.15	31	28	699.43	23.35	5.88	8.34	2.469	178.384	0.014	-1.726
FG3Q	C13-59	2	2	4	3.157	8.61	2.74	0.56	36	31	876.79	28.5	5.91	8.4	2.963	377.14	-0.29	-1.454
FG3Q	C13-60	2	2	4	2.399	6.53	1.03	0.6	34	28	471.18	19.05	10.43	8.23	2.921	318.019	1.17	-2.121
FP9Q	C13-61	3	1	5	1.768	14.74	11.38	2.37	34	27	2028.29	17.55	19.53	8.01	13.848	779.856	3.015	2.264
FP9Q	C13-62	3	1	5	0.694	10.76	3.12	1.85	35	29	1444.88	16.5	13.66	8.14	7.082	1021.82	3.24	0.314
FP9Q	C13-63	3	1	5	1.452	11.78	4.53	2.32	38	28	3214.89	16.35	18.63	7.97	14.419	779.856	3.472	0.754
FP9Q	C13-64	3	1	4	3.157	13.68	5.59	1.6	35	29	1367.44	28.3	8.14	8.1	4.503	286.293	2.977	-1.034
FP9Q	C13-65	3	1	4	1.452	5.38	2.82	0.44	36	29	878.89	23.05	11.99	8.28	3.577	381.891	3.295	-2.1
FP9Q	C13-66	3	1	4	1.136	5.97	2.57	0.22	38	27	1304.81	25.85	8.24	8.24	2.642	286.293	3.736	-2.504
FP10Q	C13-67	3	1	5	1.578	10.63	10.14	2.04	39	25	1236.14	19	9.25	7.72	7.628	222.195	2.767	-0.222
FP10Q	C13-68	3	1	5	1.073	14.03	11.61	1.92	38	25	1603.14	17.5	12.11	8.22	8.086	1328.7	2.352	0.419
FP10Q	C13-69	3	1	5	2.273	6.3	6.6	1.02	36	27	725.04	18.25	9.03	8.19	5.869	599.827	2.33	-0.918
FP10Q	C13-70	3	1	4	2.778	6.41	1.47	0.43	38	27	791.28	27.85	8.44	7.92	6.932	65.142	1.95	0.503
FP10Q	C13-71	3	1	4	2.904	10.37	2.65	0.44	37	27	976.7	28.2	8.41	8.04	4.918	553.856	2.109	-0.594
FP10Q	C13-72	3	1	4	3.725	6.57	1.43	0.61	35	28	1188.75	26.55	5.8	8.24	5.289	242.733	1.468	0.239
FP11Q	C13-73	3	1	5	1.389	8.08	7.88	2.49	34	28	844.16	19.15	14.29	8.14	4.183	90.308	1.086	-0.751
FP11Q	C13-74	3	1	5	1.199	7.2	4.05	1.21	35	30	976.79	19.95	12.11	8.13	5.63	178.643	0.64	0.332
FP11Q	C13-75	3	1	5	0.947	6.94	6.93	0.74	33	31	953.78	20.55	10.13	8.18	4.715	135.545	-2.221	0.714
FP11Q	C13-76	3	1	4	2.588	13.25	5.19	0.47	35	31	708.97	31.05	7.97	7.88	4.057	37.638	0.2	-0.125
FP11Q	C13-77	3	1	4	4.04	3.51	6.18	0.31	32	30	968.67	27.6	11.66	8.03	5.592	55.391	0.122	0.191
FP11Q	C13-78	3	1	4	1.073	4.67	4.77	0.35	32	28	680.04	30.45	5.64	8.09	3.831	52.094	-0.603	-0.347
FP7Q	C13-79	3	1	5	1.578	26.11	24.45	5.95	35	29	4650	16.75	40.95	7.51	56.264	420.275	4.392	5.251
FP7Q	C13-80	3	1	5	2.841	33.24	29.98	8.78	36	29	7754.37	16.45	41.61	7.62	32.877	420.275	3.775	5.445
FP7Q	C13-81	3	1	5	2.462	24.67	21.44	5.3	38	30	7920.53	17.05	39.1	7.43	32.908	935.701	3.712	4.926
FP7Q	C13-82	3	1	4	2.146	3.36	1.44	0.26	35	28	483.19	23.45	7.95	8.3	3.017	159.684	2.783	-2.394
FP7Q	C13-83	3	1	4	0.947	4.77	2.36	0.23	37	29	449.58	24.15	7.93	8.11	3.024	159.684	2.446	-2.516
FP7Q	C13-84	3	1	4	4.419	11.76	0.97	0.65	38	31	442.16	23.85	11.2	7.96	16.667	386.942	2.325	0.215
FP14Q	C13-85	3	1	5	1.705	20.18	13.08	1.91	46	30	1460.69	18.3	12.8	7.59	7.306	642.167	2.843	0.04
FP14Q	C13-86	3	1	5	3.788	14.16	20.03	3.69	46	26	699.47	17.5	21.32	7.61	36.211	392.018	4	5.362
FP14Q	C13-87	3	1	5	4.104	10.55	13.28	1.45	40	25	1058.02	20.2	10.85	8.21	4.262	642.167	2.797	-0.969
FP14Q	C13-88	3	1	4	2.652	4.64	0.81	0.32	45	30	540.52	25.75	5.76	8.37	2.376	247.86	3.649	-2.32
FP14Q	C13-89	3	1	4	1.452	4.71	1.61	0.21	38	30	509.19	24.8	7.94	8.34	2.168	121.622	3.765	-2.602
FP14Q	C13-90	3	1	4	1.199	4.01	1.65	0.28	41	27	245.24	23.7	8.27	8.48	1.874	247.86	3.629	-2.423
